# Supplementary material for: Histone Methyltransferase KMT2B Promotes Metastasis and Angiogenesis of Cervical Cancer by Upregulating EGF Expression
Source: PubMed Central journal article supplement (PMC9760441; doi:10.7150/ijbs.72381), 2023-01-01
Supplement: ijbsv19p0034s1.pdf [file ijbsv19p0034s1.pdf]

# Histone Methyltransferase KMT2B Promotes Metastasis and Angiogenesis of Cervical Cancer by Upregulating EGF Expression

Dan Zhao, Hui Yuan, Yuan Fang, Jian Gao, Huimin Li, Mengge Li, Hui Cong, Chenglin Zhang, Yiyi Liang, Jin Li, Hanco Yang, Ming Yao, Min Du, Hong Tu, Yu Gan

## Supplementary Data

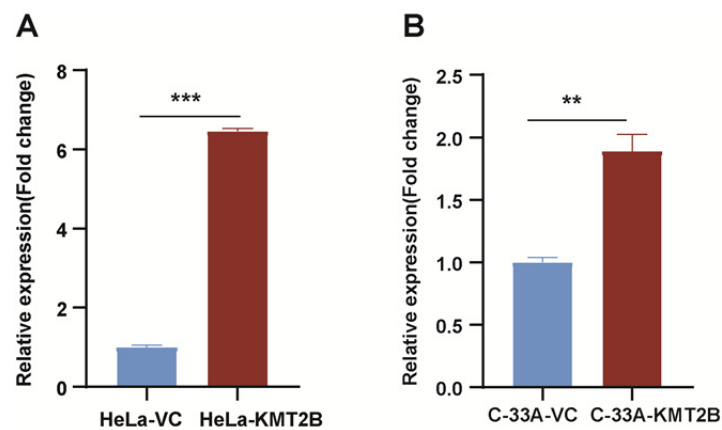

**Figure S1. Quantitative real-time PCR analysis of the KMT2B mRNA expression level in KMT2B overexpression CC cells.** (A) The expression of KMT2B in HeLa-VC and HeLa-KMT2B cells. (B) The expression of KMT2B in C-33A-VC and C-33A-KMT2B cells. \* $P < 0.05$ , \*\* $P < 0.01$ , \*\*\*  $P < 0.001$ .

**Table S1. Clinicopathologic features of CC cases**

| <b>Tissue No.</b> | <b>Gender</b> | <b>Age</b> | <b>Histological grade</b> | <b>Clinical stage</b> | <b>Pathological typing</b> |
|-------------------|---------------|------------|---------------------------|-----------------------|----------------------------|
| J03A0274          | Female        | 34         | G2                        | II                    | Squamous cell carcinoma    |
| J03A0275          | Female        | 44         | G2                        | II                    | Squamous cell carcinoma    |
| J03A0276          | Female        | 26         | G2                        | II                    | Squamous cell carcinoma    |
| J03A0277          | Female        | 39         | G2                        | II                    | Squamous cell carcinoma    |
| J03A0278          | Female        | 40         | G2                        | II                    | Squamous cell carcinoma    |
| J03A0279          | Female        | 38         | G2                        | II                    | Squamous cell carcinoma    |
| J03A0280          | Female        | 49         | G2                        | II                    | Squamous cell carcinoma    |
| J03A0281          | Female        | 49         | G2                        | II                    | Squamous cell carcinoma    |
| J03A0282          | Female        | 46         | G2                        | II                    | Squamous cell carcinoma    |
| J03A0283          | Female        | 47         | G2                        | II                    | Squamous cell carcinoma    |
| J03A0284          | Female        | 46         | G2                        | II                    | Squamous cell carcinoma    |
| J03A0285          | Female        | 36         | G2                        | II                    | Squamous cell carcinoma    |
| J03A0286          | Female        | 38         | G2                        | II                    | Squamous cell carcinoma    |
| J03A0287          | Female        | 38         | G2                        | II                    | Squamous cell carcinoma    |
| J03A0288          | Female        | 35         | G2                        | II                    | Squamous cell carcinoma    |
| J03A0289          | Female        | 58         | G2                        | II                    | Squamous cell carcinoma    |
| J03A0290          | Female        | 41         | G2                        | II                    | Squamous cell carcinoma    |

|          |        |       |    |    |                         |
|----------|--------|-------|----|----|-------------------------|
| J03A0291 | Female | 41    | G2 | II | Squamous cell carcinoma |
| J03A0292 | Female | 33    | G2 | II | Squamous cell carcinoma |
| J03A0293 | Female | 39    | G2 | II | Squamous cell carcinoma |
| J03A0214 | Female | Adult | G1 | II | Squamous cell carcinoma |
| J03A0218 | Female | Adult | G3 | II | Squamous cell carcinoma |
| J03A0220 | Female | Adult | G1 | II | Squamous cell carcinoma |
| J03A0235 | Female | Adult | G2 | II | Squamous cell carcinoma |
| J03A0242 | Female | Adult | G2 | II | Squamous cell carcinoma |
| J03A0027 | Female | 36    | G1 | II | Squamous cell carcinoma |
| J03A0033 | Female | 45    | G2 | II | Squamous cell carcinoma |
| J03A0045 | Female | 42    | G2 | II | Squamous cell carcinoma |
| J03A0062 | Female | 46    | G2 | II | Squamous cell carcinoma |
| J03A0136 | Female | 42    | G2 | II | Squamous cell carcinoma |
| J03A0141 | Female | 48    | G3 | II | Squamous cell carcinoma |

---

**Table S2. sgRNA sequence for *KMT2B* gene knockout**

| Seq No. | Forward (5'-3')           | Reverse (5'-3')           |
|---------|---------------------------|---------------------------|
| sgRNA1  | caccGTGCGGGTAGCTCTGCGGCG  | aaacCGCCGCAGAGCTACCCGCAC  |
| sgRNA2  | caccGAAAGAGTGCGGGTAGCTCTG | aaacCAGAGCTACCCGCACTCTTTC |

Note: cacc and aaac in lower case are overhangs for ligation into the pair of *BbsI* sites in pSpCas9(BB)-2A-GFP (PX458) vector.

**Table S3. Primers used in quantitative real-time PCR and ChIP-PCR**

| Target              | Primer Sequence (5'-3')         |
|---------------------|---------------------------------|
| <i>KMT2B</i>        | Forward: CCGAGTCGAGGCTGCGTG     |
|                     | Reverse: CTCGCTGGGATCGGAGCG     |
| <i>EGF</i>          | Forward: TGTCCACGCAATGTGTCTGAA  |
|                     | Reverse: CATTATCGGGTGAGGAACAACC |
| <i>GAPDH</i>        | Forward: AGAAGGCTGGGGCTCATTTG   |
|                     | Reverse: AGGGGCCATCCACAGTCTTC   |
| <i>EGF</i> promoter | Forward: TTCACCATGAGCACCTCCAC   |
|                     | Reverse: GCTCTGGCTGACTTCACTGT   |

**Table S4. Number of animal with metastasis in tail-vein injection mouse model**

|                 | HeLa-VC     | HeLa-KMT2B  | <i>P</i> value |
|-----------------|-------------|-------------|----------------|
| Bone metastasis | 1/6 (16.7%) | 5/6 (83.3%) | 0.018          |
| Lung metastasis | 0/6 (0%)    | 0/6 (0%)    | NA             |

**Table S5. Genes showing transcriptional up-regulation and increased H3K4me3 peak at promoter region in KMT2B-overexpressing**

HeLa cells

| Gene    | RNA-seq                         |                              |                                    |          | ChIP-seq           |                 |                |                    |          |
|---------|---------------------------------|------------------------------|------------------------------------|----------|--------------------|-----------------|----------------|--------------------|----------|
|         | HeLa-KMT2B<br>FPKM<br>(average) | HeLa-VC<br>FPKM<br>(average) | Log2FC<br>(HeLa-KMT2B<br>/HeLa-VC) | <i>P</i> | HeLa-KMT2B<br>Tags | HeLa-VC<br>Tags | Fold<br>change | Distance<br>to TSS | <i>P</i> |
| GPR162  | 19.75                           | 1.75                         | 3.53                               | 3.32E-07 | 150.6              | 25              | 6.02           | -10                | 1.43E-64 |
| MAGEB18 | 6                               | 0                            | 5.06                               | 1.23E-04 | 29.3               | 1               | 29.3           | -27                | 4.30E-32 |
| EGF     | 33.25                           | 6.75                         | 2.37                               | 7.93E-04 | 15                 | 5               | 3              | 128                | 6.98E-04 |
| A1CF    | 14                              | 0.5                          | 4.84                               | 1.72E-05 | 24.03              | 0.5             | 48.53          | 199                | 5.83E-32 |
| HMOX2   | 74.75                           | 12.25                        | 2.74                               | 8.61E-04 | 12.8               | 2               | 6.42           | -690               | 1.36E-06 |
| NPPB    | 58                              | 2                            | 5.01                               | 2.67E-03 | 59.9               | 11              | 5.45           | -338               | 4.08E-24 |
| CHFR    | 44.75                           | 2                            | 4.51                               | 9.64E-11 | 38.5               | 3               | 12.85          | -67                | 1.39E-28 |
| SULT1C2 | 32.75                           | 5                            | 2.71                               | 1.91E-06 | 17.8               | 1               | 17.8           | -241               | 1.09E-15 |
| IL31RA  | 207.5                           | 22                           | 3.28                               | 2.89E-32 | 43.5               | 0.5             | 87.07          | -3                 | 1.14E-66 |
| MAGEA9  | 10.75                           | 1.25                         | 3.16                               | 1.56E-03 | 22.8               | 6               | 3.81           | -643               | 3.91E-07 |
| PCLO    | 467.25                          | 13                           | 5.26                               | 4.42E-26 | 52.1               | 7               | 7.44           | -277               | 1.15E-27 |

|              |       |       |      |          |       |    |       |       |          |
|--------------|-------|-------|------|----------|-------|----|-------|-------|----------|
| MAGEB6       | 24.75 | 1.5   | 4.08 | 1.77E-07 | 27.1  | 2  | 13.56 | 115   | 1.80E-21 |
| CARD6        | 61.5  | 4.75  | 3.72 | 1.45E-12 | 32.1  | 6  | 5.35  | 173   | 9.15E-14 |
| ANK2         | 13.75 | 1.75  | 2.97 | 1.42E-04 | 93.5  | 7  | 13.6  | 197   | 3.34E-69 |
| SULT2A1      | 12.5  | 2     | 2.65 | 8.94E-04 | 16.4  | 2  | 8.2   | -56   | 4.80E-10 |
| CFLAR-AS1    | 15.75 | 22.75 | 2.64 | 3.33E-03 | 62.8  | 11 | 5.71  | -611  | 2.55E-10 |
| DPPA2        | 7.25  | 0.25  | 4.60 | 2.68E-04 | 13.6  | 4  | 3.39  | -257  | 2.74E-04 |
| EDIL3        | 46.25 | 2.5   | 4.18 | 1.20E-07 | 107.1 | 32 | 3.35  | 170   | 1.65E-25 |
| IKZF2        | 13.25 | 1.75  | 2.93 | 1.62E-03 | 119.2 | 26 | 4.58  | -924  | 2.82E-40 |
| GBP1         | 49.75 | 1.5   | 5.10 | 9.49E-08 | 21.4  | 2  | 10.71 | 142   | 6.11E-15 |
| SPTB         | 310   | 61    | 2.38 | 8.06E-32 | 22.1  | 7  | 3.16  | -373  | 4.53E-06 |
| CYB5R2       | 28.5  | 5     | 2.61 | 3.78E-04 | 37.1  | 3  | 12.37 | -2920 | 1.77E-27 |
| ARHGEF25     | 88.25 | 19.25 | 2.25 | 1.43E-12 | 16.4  | 1  | 16.4  | -671  | 1.87E-14 |
| LOC101926940 | 47.25 | 9     | 2.42 | 3.73E-06 | 30    | 4  | 7.49  | -1623 | 6.8E-16  |
| LOC729987    | 7.75  | 0.25  | 4.71 | 1.18E-03 | 80.6  | 4  | 20.16 | 45    | 3.93E-73 |
| LINC00664    | 10.25 | 0     | 5.87 | 1.24E-05 | 41.4  | 11 | 3.76  | -617  | 3.36E-12 |
